# Supplementary material for: Impact of extramedullary disease in patients with newly diagnosed multiple myeloma undergoing autologous stem cell transplantation: a study from the Chronic Malignancies Working Party of the EBMT
Source: PubMed Central journal article supplement — Haematologica. 2018 Feb 1;103(5):890–7. doi: 10.3324/haematol.2017.178434 (PMC5927971; doi:10.3324/haematol.2017.178434), 2018-05
Supplement: 2017_178434-Disclosures_and_Contributions.pdf [file 2017_178434-Disclosures_and_Contributions.pdf]

Haematologica  
HAEMATOL/2017/178434  
Version 4

Impact of extramedullary disease in patients with newly diagnosed multiple myeloma undergoing autologous stem cell transplantation: A study from the Chronic Malignancies Working Party of the EBMT

Nico Gagelmann, Diderik-Jan Eikema, Simona Iacobelli, Linda Koster, Hareth Nahi, Anne-Marie Stoppa, Tamás Masszi, Denis Caillot, Stig Lenhoff, Miklos Udvardy, Charles Crawley, William Arcese, Clara Mariette, Ann Hunter, Xavier Leleu, Martin Schipperus, Michel Delforge, Pietro Pioltelli, John A. Snowden, Maija Itälä-Remes, Maurizio Musso, Anja van Biezen, Laurent Garderet, and Nicolaus Kröger

Disclosures: Conflict of interests have been declared by Anne-Marie Stoppa regarding honoraria from Celgene, Janssen, Amgen, and Takeda, regarding consulting or advisory role by Celgene, Janssen, Amgen, and BMS, Celgene, Janssen, and Amgen regarding travel, accommodation, and expenses. Tamás Masszi declared COI regarding consulting or advisory role, travel accommodations, or expenses by Janssen Cilag, Novartis, BMS, Abbvie, and Takeda. William Arcese declared COI regarding travel, accommodations, or expenses by Pierre Fabre, ABN, and Merck. Michel Delforge declared COI regarding honoraria from Janssen, consulting or advisory role by Amgen, BMS, Celgene, and Takeda, and research funding for his institution from Celgene and Janssen. Nicolaus Kröger received honoraria and research grants from Sanofi, Celgene and Amgen. John A. Snowden declared COI regarding honoraria as well as travel, accommodations, or expenses from Sanofi. All other authors declared no conflict of interests.

Contributions: NG and NK designed the work, performed statistics, and wrote the manuscript. AvB and LK collected the data from the EBMT data base, D-JE and SI performed statistics and wrote the manuscript. HN, A-MS, TM, DC, SL, MU, CC, WA, MC, AH, LX, MS, MD, PP, JAS, MI-R, MM, and LG contributed patients and collected, analyzed, and interpreted the data. All authors approved the final version of the paper.
